# Supplementary material
Source: publisher site journal article supplement (https://www.dovepress.com/article/551775)
Supplement: Supplementary file 1 [file 551775%20Revised%20Supplementary%20Materials.docx]

**Supplementary Material**

**eTable 1** Clinical Characteristics of Pediatric Patients with Urine Samples

| Characteristics | Septic shock survivors | Septic shock non-survivors | *p* value |
| --- | --- | --- | --- |
| Patients (n) | 27 | 10 |  |
| Male (n, %) | 16 (59.3%) | 5 (50.0%) | 0.614 |
| Age, years (median, IQR) | 1.5 (0.3–8.9) | 4.4(1.4–5.9) | 0.389 |
| Lactic acid (mmol/L) | 2.0 (1.1–4.5) | 2.6 (1.9–5.6) | 0.191 |
| PCT (ng/mL) |  |  |  |
| >100 (n, %) | 13 (48.2%) | 4 (40.0%) | 0.658 |
| ≤100 (median, IQR) | 11.6 (1.7–65.0) | 7.9 (5.3–30.7) | 1.000 |
| Underlying disease (n, %) | 4 (14.8%) | 4 (40.0%) | 0.098 |
| PRISM III score (median, IQR) | 3.0 (2.0–3.5) | 2.6 (1.5–4.5) | 1.000 |
| Organ dysfunction (n, %） |  |  |  |
| Respiratory system | 24 (88.9%) | 10 (100.0%) | 0.271 |
| Cardiovascular system | 27 (100.0%) | 10 (100.0%) | N/A |
| Hematologic system | 19 (70.4%) | 7 (70.0%) | 0.983 |
| Neurologic system | 11 (40.7%) | 7 (70.0%) | 0.114 |
| Hepatic system | 8 (29.6%) | 6 (60.0%) | 0.091 |
| Renal system | 13 (48.2%) | 7 (70.0%) | 0.236 |
| Pathogenic bacteria (n, %) |  |  |  |
| Gram-positive bacteria | 6 (22.2%) | 1 (10.0%) | 0.399 |
| Gram-negative bacteria | 8 (29.6%) | 2 (20.0%) | 0.558 |
| Fungi | 2 (7.4%) | 3 (30.0%) | 0.074 |
| Positive blood culture (n, %) | 8 (29.6%) | 1 (10.0%) | 0.217 |

**Abbreviations:** PCT, procalcitonin; PRISM III, pediatric risk of mortality III.

**eTable 2** Identified differential metabolites of the three comparative groups in positive mode

| **Metabolites** | **SS-**  **SIRS** | **SNS-**  **SIRS** | **SNS-**  **SS** | **Pathways** | **KEGG ID** |
| --- | --- | --- | --- | --- | --- |
| **FC** | **FC** | **FC** |
| Anthranilic acid (Vitamin L1) | **—** | **—** | 1.60 | Amino acid metabolism | C00108 |
| Betaine | **—** | **—** | 1.39 | Amino acid metabolism | C00318 |
| Creatine | 0.68 | 2.35 | **—** | Amino acid metabolism | C00300 |
| Creatinine | 1.81 | 2.24 | **—** | Amino acid metabolism | C00791 |
| Dopamine | **—** | 1.86 | **—** | Amino acid metabolism | C03758 |
| D-Proline | **—** | **—** | 1.51 | Amino acid metabolism | C00763 |
| Glycine | **—** | **—** | 1.51 | Amino acid metabolism | C00037 |
| L-Alanine | **—** | 2.34 | **—** | Amino acid metabolism | C00041 |
| L-Glutamate | **—** | 1.57 | 1.24 | Amino acid metabolism | C00025 |
| L-Histidine | 0.50 | 0.44 | **—** | Amino acid metabolism | C00135 |
| L-Isoleucine | **—** | **—** | 1.31 | Amino acid metabolism | C00407 |
| L-Lysine | **—** | **—** | 1.26 | Amino acid metabolism | C00047 |
| L-Phenylalanine | **—** | 1.64 | **—** | Amino acid metabolism | C00079 |
| L-Proline | **—** | 2.15 | 1.82 | Amino acid metabolism | C00148 |
| L-Saccharopine | **—** | 3.49 | 2.21 | Amino acid metabolism | C00449 |
| L-Threonine | **—** | **—** | 1.36 | Amino acid metabolism | C00188 |
| L-Tyrosine | **—** | **—** | 1.43 | Amino acid metabolism | C00082 |
| N-Acetylputrescine | 2.27 | **—** | **—** | Amino acid metabolism | C02714 |
| Sarcosine | 0.77 | **—** | **—** | Amino acid metabolism | C00213 |
| S-Methyl-5'-thioadenosine | 1.59 | **—** | **—** | Amino acid metabolism | C00170 |
| Tyramine | **—** | 1.64 | **—** | Amino acid metabolism | C00483 |
| Urea | 1.44 | **—** | **—** | Amino acid metabolism | C00086 |
| D-gluconate | **—** | **—** | 1.72 | Carbohydrate metabolism | C00257 |
| Diacetyl | 1.82 | 1.61 | **—** | Carbohydrate metabolism | C00741 |
| Stachyose | 0.16 | **—** | **—** | Carbohydrate metabolism | C01613 |
| 1-Stearoyl-2-oleoyl-sn-glycerol 3-phosphocholine (SOPC) | 0.62 | 0.55 | **—** | Lipid metabolism | C00157 |
| Diethanolamine | **—** | 1.72 | 1.53 | Lipid metabolism | C06772 |
| Glycochenodeoxycholate | **—** | **—** | 3.66 | Lipid metabolism | C05466 |
| Glycocholic acid | **—** | **—** | 6.03 | Lipid metabolism | C01921 |
| L-Palmitoylcarnitine | 0.78 | **—** | **—** | Lipid metabolism | C02990 |
| sn-Glycerol 3-phosphoethanolamine | 0.58 | **—** | 1.76 | Lipid metabolism | C01233 |
| Sphingomyelin (d18:1/18:0) | **—** | 0.66 | 1.60 | Lipid metabolism | C00550 |
| Taurodeoxycholic acid | **—** | **—** | 3.99 | Lipid metabolism | C05463 |
| PC(16:0/16:0) | 0.53 | 0.46 | **—** | Lipid metabolism | C00157 |
| Phosphorylcholine | 0.75 | 0.80 | **—** | Lipid metabolism | C00588 |
| N1-Methyl-2-pyridone-5-carboxamide | 2.93 | 4.01 | **—** | Metabolism of cofactors and vitamins | C05842 |
| L-Pyroglutamic acid | **—** | **—** | 1.48 | Metabolism of other amino acids | C01879 |
| Pseudouridine | 2.29 | 2.73 | **—** | Nucleotide metabolism | C02067 |
| N-Acetyl-D-glucosamine | 1.71 | **—** | **—** | ABC transporters | C00140 |
| Isovaleric acid | 0.70 | 0.74 | **—** | Protein digestion and absorption | C08262 |
| Pantothenate | 2.80 | 4.01 | **—** | Pantothenate and CoA biosynthesis | C00864 |
| (3-Carboxypropyl)trimethylammonium cation | 2.28 | 1.93 | **—** | **—** | — |
| .beta.-Cyano-L-alanine | 0.39 | 0.36 | **—** | **—** | — |
| .gamma.-L-Glu-.epsilon.-L-Lys | **—** | **—** | 1.93 | **—** | — |
| 16-Hydroxypalmitic acid | **—** | 0.58 | 0.66 | **—** | — |
| 1-O-(cis-9-Octadecenyl)-2-O-acetyl-sn-glycero-3-phosphocholine | 0.64 | 0.64 | **—** | **—** | — |
| 1-Palmitoyllysophosphatidylcholine | 0.69 | 0.70 | **—** | **—** | — |
| 1-Palmitoyl-sn-glycero-3-phosphocholine | 0.58 | 0.49 | 1.57 | **—** | — |
| 2-Amino-2-methyl-1,3-propanediol | **—** | **—** | 1.47 | **—** | — |
| 2-Methylbutyroylcarnitine | 2.34 | 2.85 | **—** | **—** | — |
| 6-Aminocaproic acid | 0.08 | 0.07 | **—** | **—** | — |
| Acadesine (Drug) | 2.30 | **—** | **—** | **—** | D02742 |
| Acetylglycine | **—** | **—** | 0.39 | **—** | — |
| Allantoin | 0.65 | **—** | **—** | **—** | C01551 |
| Arg-Cys | **—** | **—** | 0.78 | **—** | — |
| Decanoyl-L-carnitine | 1.80 | 1.90 | **—** | **—** | — |
| Diazepam | **—** | **—** | 5.14 | **—** | — |
| Diethyltoluamide | 0.52 | 0.53 | **—** | **—** | — |
| DL-Indole-3-lactic acid | 0.64 | **—** | **—** | **—** | — |
| DL-O-tyrosine | 0.73 | **—** | **—** | **—** | — |
| D-Mannitol | **—** | **—** | 3.37 | Fructose and mannose metabolism | C00392 |
| D-Pipecolinic acid | 2.44 | **—** | 2.13 | **—** | — |
| Gly-Arg | **—** | **—** | 1.82 | **—** | — |
| Gly-Gln | 4.55 | **—** | **—** | **—** | — |
| His-Glu | 0.25 | 0.29 | **—** | **—** | — |
| Indoleacrylic acid | 0.70 | **—** | **—** | **—** | — |
| Inosine | **—** | 2.36 | 1.74 | Purine metabolism | C00294 |
| KOdiA-PC | 0.72 | **—** | **—** | **—** | — |
| N2,N2-Dimethylguanosine | 2.18 | 3.92 | 1.79 | **—** | — |
| N6-methyladenosine | 1.35 | **—** | 0.84 | **—** | — |
| N-Acetylneuraminic acid | 3.29 | **—** | 1.93 | **—** | C19910 |
| Norharmane | 0.56 | 0.50 | **—** | **—** | — |
| Ornithine | 0.39 | 1.63 | 1.56 | **—** | C01602 |
| Oxindole | **—** | **—** | 2.51 | **—** | — |
| Pro-Glu | 3.36 | **—** | **—** | **—** | — |
| Ribitol | **—** | 2.27 | **—** | Pentose and glucuronate interconversions | C00474 |
| Sebacic acid | 0.60 | **—** | **—** | **—** | C08277 |
| Thr-Glu | **—** | 2.16 | 1.56 | **—** | **—** |

**Abbreviations:** SS, septic shock survivors; SNS, septic shock non-survivors; SIRS, non-infected SIRS control; FC fold change; KEGG, Kyoto Encyclopedia of Genes and Genomes.

**eTable 3** Identified differential metabolites of the three comparative groups in negative mode

| **Metabolites** | **SS-SIRS** | **SNS-SIRS** | **SNS-**  **SS** | **Pathways** | **KEGG ID** |
| --- | --- | --- | --- | --- | --- |
| **FC** | **FC** | **FC** |
| Benzoic acid | 0.70 | 0.70 | **—** | Amino acid metabolism | C00180 |
| D-Proline | **—** | **—** | 1.92 | Amino acid metabolism | C00763 |
| L-Glutamine | **—** | **—** | 1.41 | Amino acid metabolism | C00064 |
| L-Histidine | 0.11 | 0.13 | **—** | Amino acid metabolism | C00135 |
| L-Tryptophan | 0.60 | 0.65 | **—** | Amino acid metabolism | C00078 |
| Creatinine | 1.88 | 2.55 | **—** | Amino acid metabolism | C00791 |
| D-Mannose | 0.73 | 0.64 | **—** | Carbohydrate metabolism | C00159 |
| D-Tagatose | 0.79 | **—** | **—** | Carbohydrate metabolism | C00795 |
| L-Gulonic gamma-lactone | 0.75 | 0.57 | 0.64 | Carbohydrate metabolism | C01040 |
| myo-Inositol | 2.56 | 3.08 | **—** | Carbohydrate metabolism | C00137 |
| Oleic acid(C18:1 *n*-9) | **—** | **—** | 0.65 | Fatty acid metabolism | C00712 |
| Palmitic acid(C16:0) | 0.86 | 0.87 | **—** | Fatty acid metabolism | C00249 |
| pregnenolone sulfate | 3.20 | 2.69 | **—** | Lipid metabolism | C18044 |
| Glycochenodeoxycholate | **—** | **—** | 3.75 | Lipid metabolism | C05466 |
| Glycocholic acid | **—** | **—** | 5.79 | Lipid metabolism | C01921 |
| Deoxycholic acid | **—** | 0.52 | **—** | Bile secretion | C04483 |
| Taurochenodeoxycholate | **—** | **—** | 4.51 | Bile acid metabolism | C05465 |
| L-Phenylalanine | **—** | 1.54 | **—** | Membrane transport | C00079 |
| 2-Hydroxy-3-methylbutyric acid | **—** | 2.14 | **—** | **—** | **—** |
| 2-hydroxy-butanoic acid | **—** | 1.77 | **—** | **—** | **—** |
| 3-Methoxy-4-Hydroxyphenylglycol Sulfate | 2.74 | **—** | **—** | **—** | **—** |
| Acamprosate | 0.36 | 0.51 | **—** | **—** | **—** |
| Adynerin | **—** | **—** | 6.47 | **—** | **—** |
| DL-3-Phenyllactic acid | **—** | 2.76 | **—** | **—** | **—** |
| DL-lactate | 0.78 | **—** | 1.27 | **—** | C00256/C00186 |
| D-Quinovose | **—** | **—** | 2.09 | **—** | **—** |
| D-Threitol | **—** | 2.14 | **—** | **—** | C16884 |
| Enterostatin human | 2.42 | 3.47 | **—** | **—** | **—** |
| L-Carnitine | **—** | 11.88 | **—** | Bile secretion | C00318 |
| m-Chlorohippuric acid | **—** | 0.63 | 0.81 | **—** | **—** |
| Pseudouridine | 2.29 | 2.73 | **—** | Pyrimidine metabolism | C02067 |
| Ramipril | 1.78 | 1.97 | **—** | **—** | **—** |
| Uric acid | **—** | 2.16 | **—** | Purine metabolism | C00366 |

**Abbreviations:** SS, septic shock survivors; SNS, septic shock non-survivors; SIRS, non-infected SIRS control; FC fold change; KEGG, Kyoto Encyclopedia of Genes and Genomes.


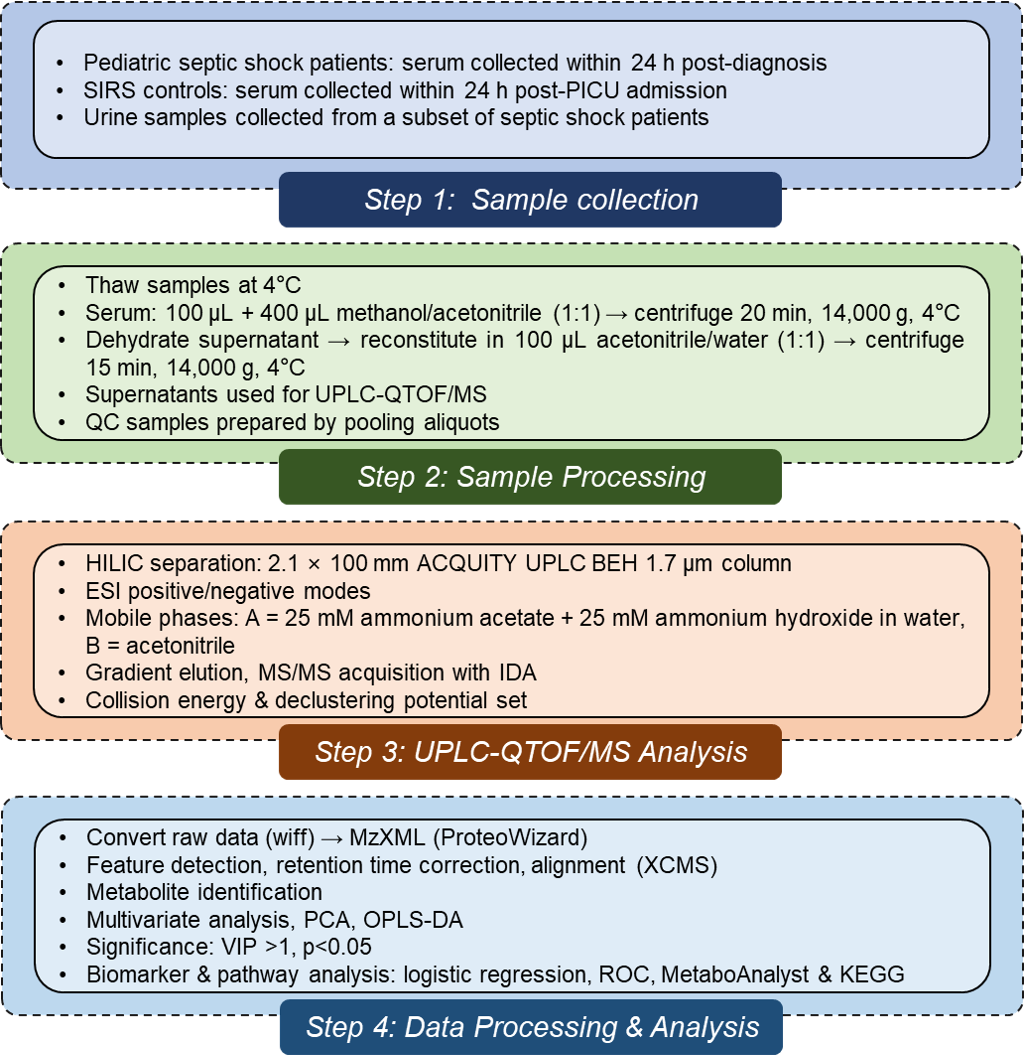


**eFigure 1** Flowchart of sample preparation and UPLC-QTOF/MS analysis.


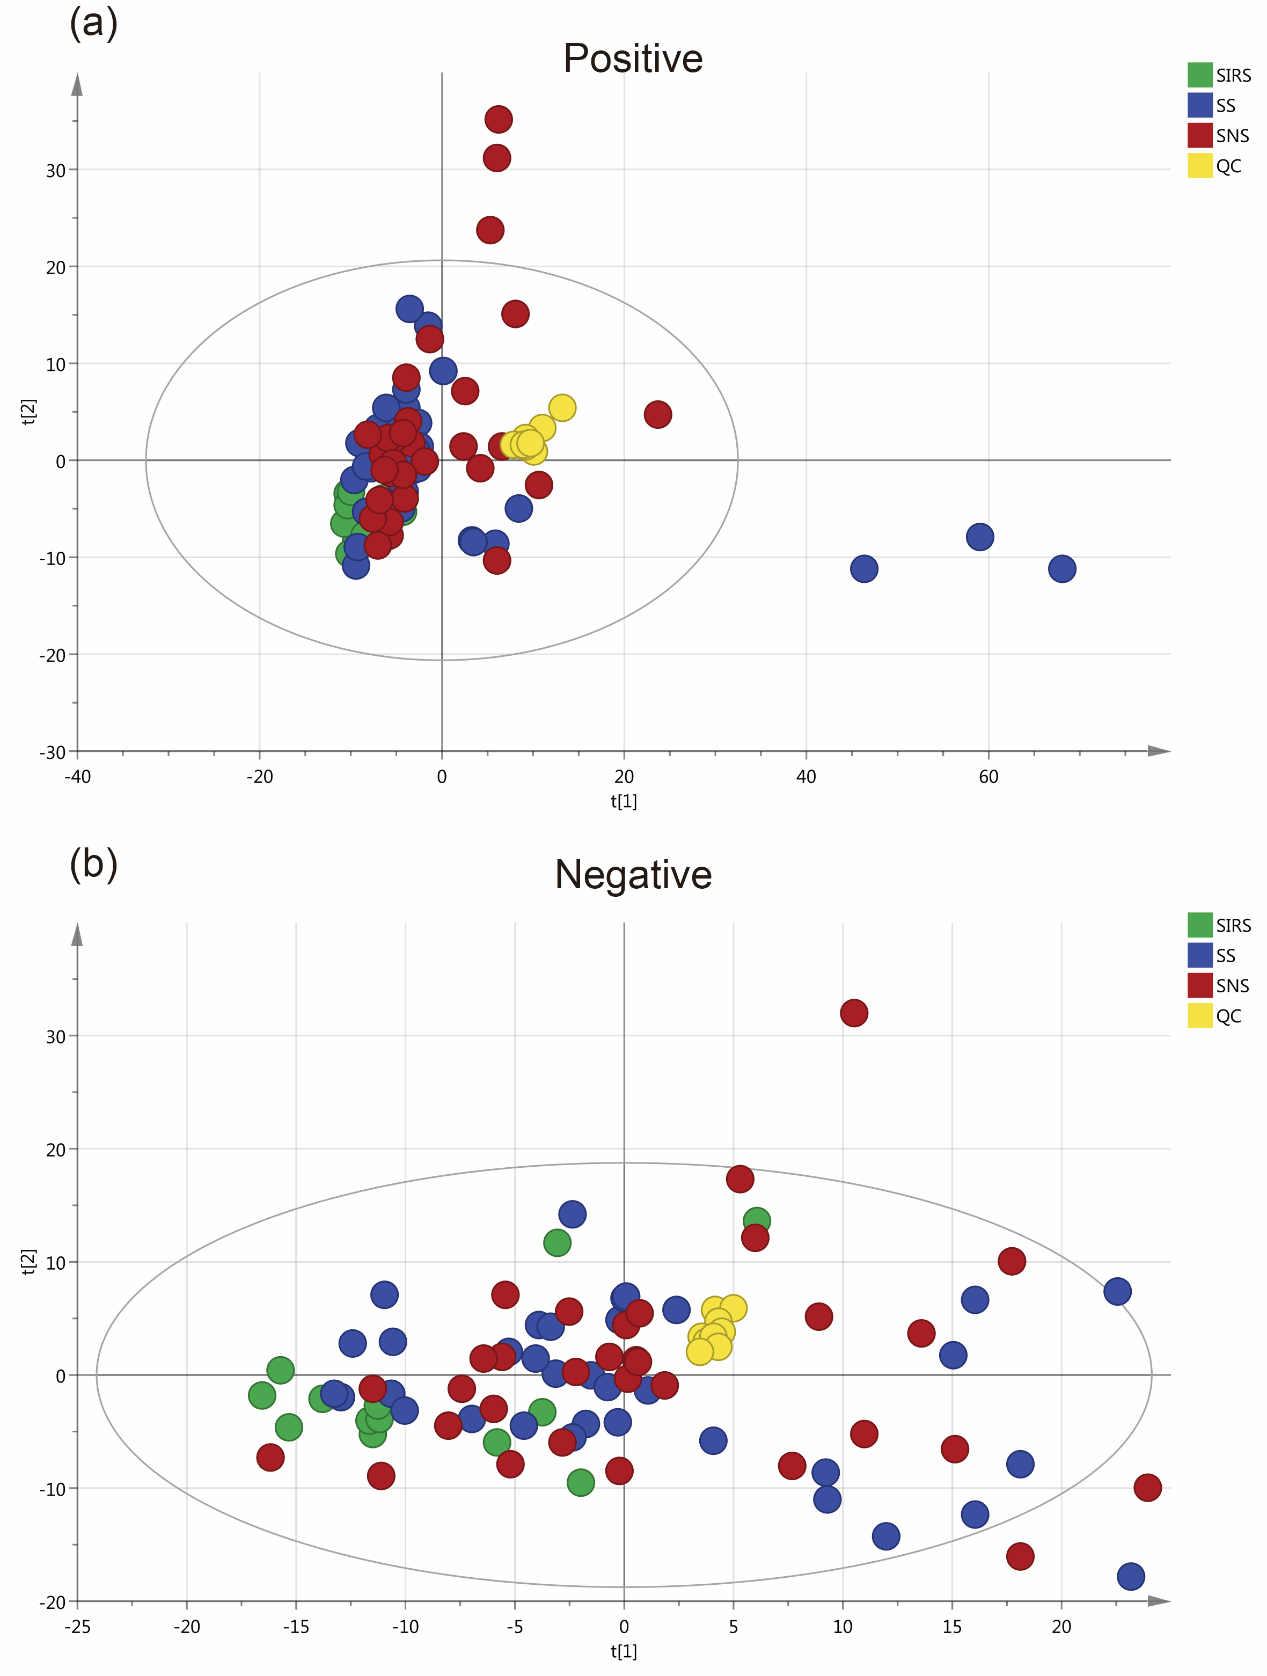


**eFigure 2** Principal component analysis score scatter plots (a) in positive model and (b) in negative model.

**Abbreviations:** SS, septic shock survivors; SNS, septic shock non-survivors; SIRS, non-infected SIRS controls; QC, quality control.


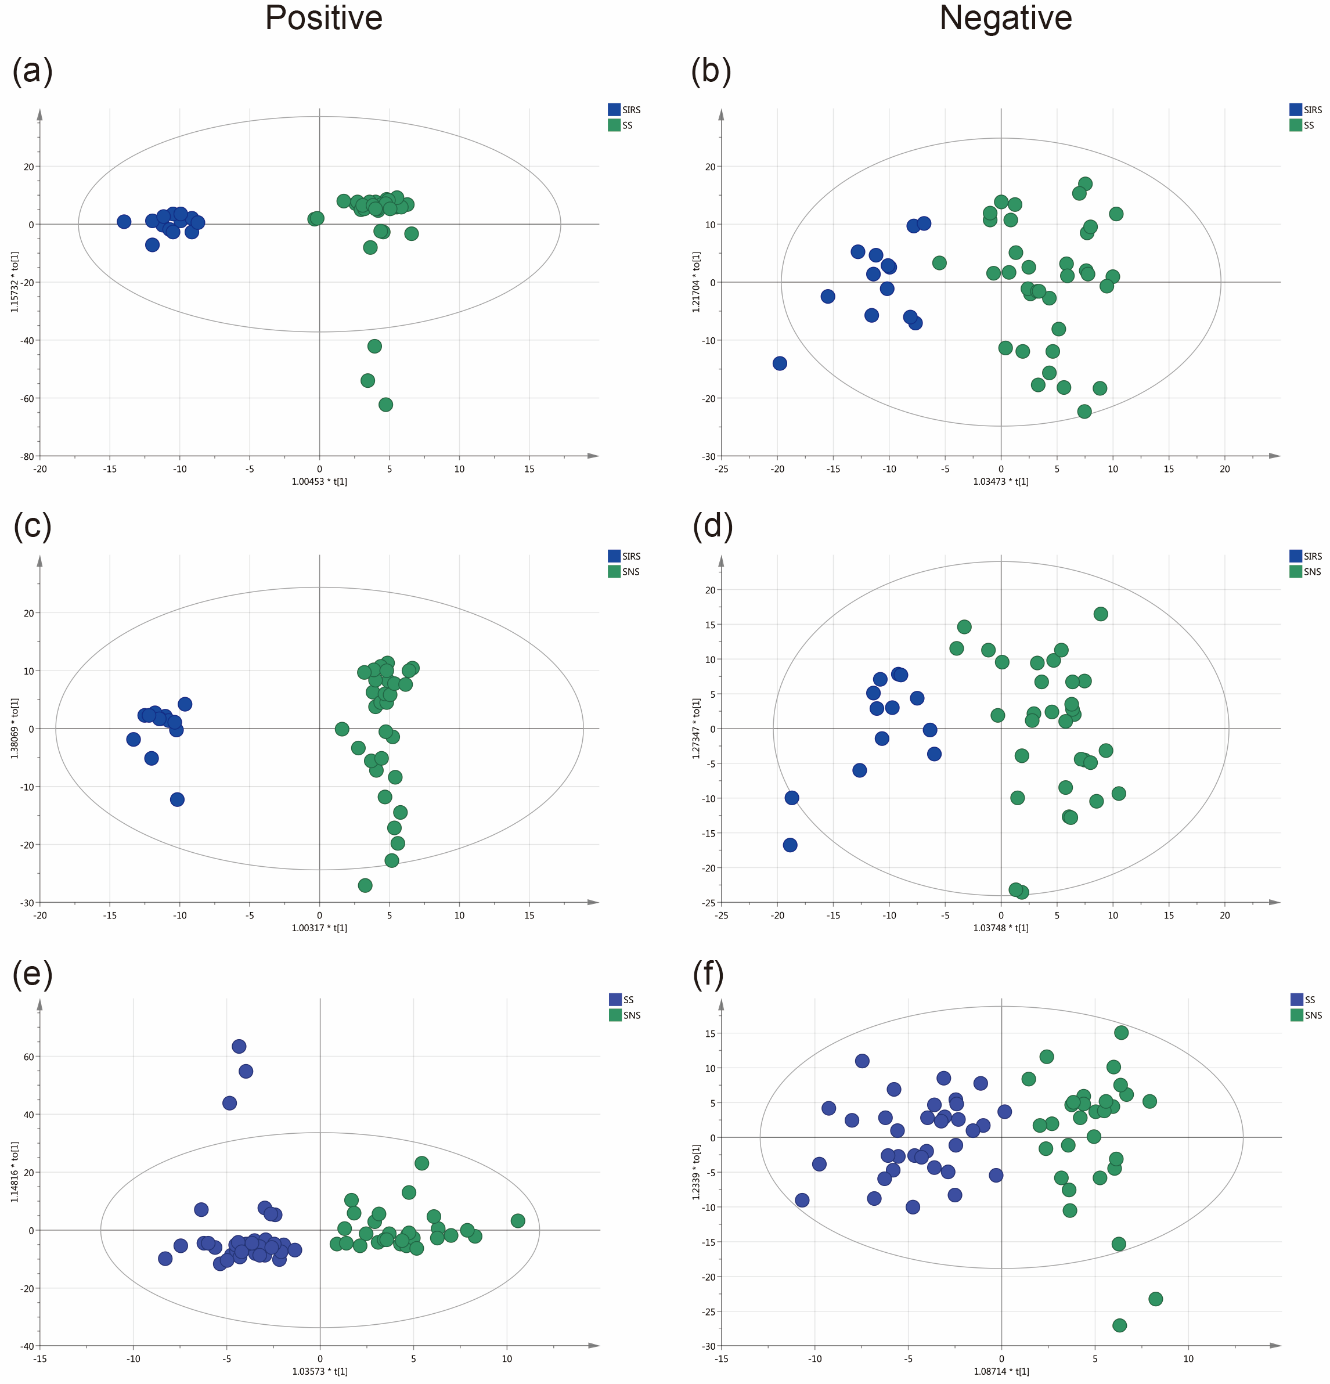


**eFigure 3** Orthogonal Partial least square discriminant analysis (OPLS-DA) score plots of septic patients versus non-infected SIRS controls and septic survivors versus septic non-survivors. OPLS-DA score plots for septic shock survivors (SS) versus non-infected SIRS controls (SIRS) separation (a) in positive mode and (b) in negative mode; OPLS-DA score plots for septic shock non-survivors (SNS) versus non-infected SIRS controls (SIRS) separation (c) in positive mode and (d) in negative mode. OPLS-DA score plots for septic shock survivors (SS) versus septic shock non-survivors (SNS) separation (e) in positive mode and (f) in negative mode.


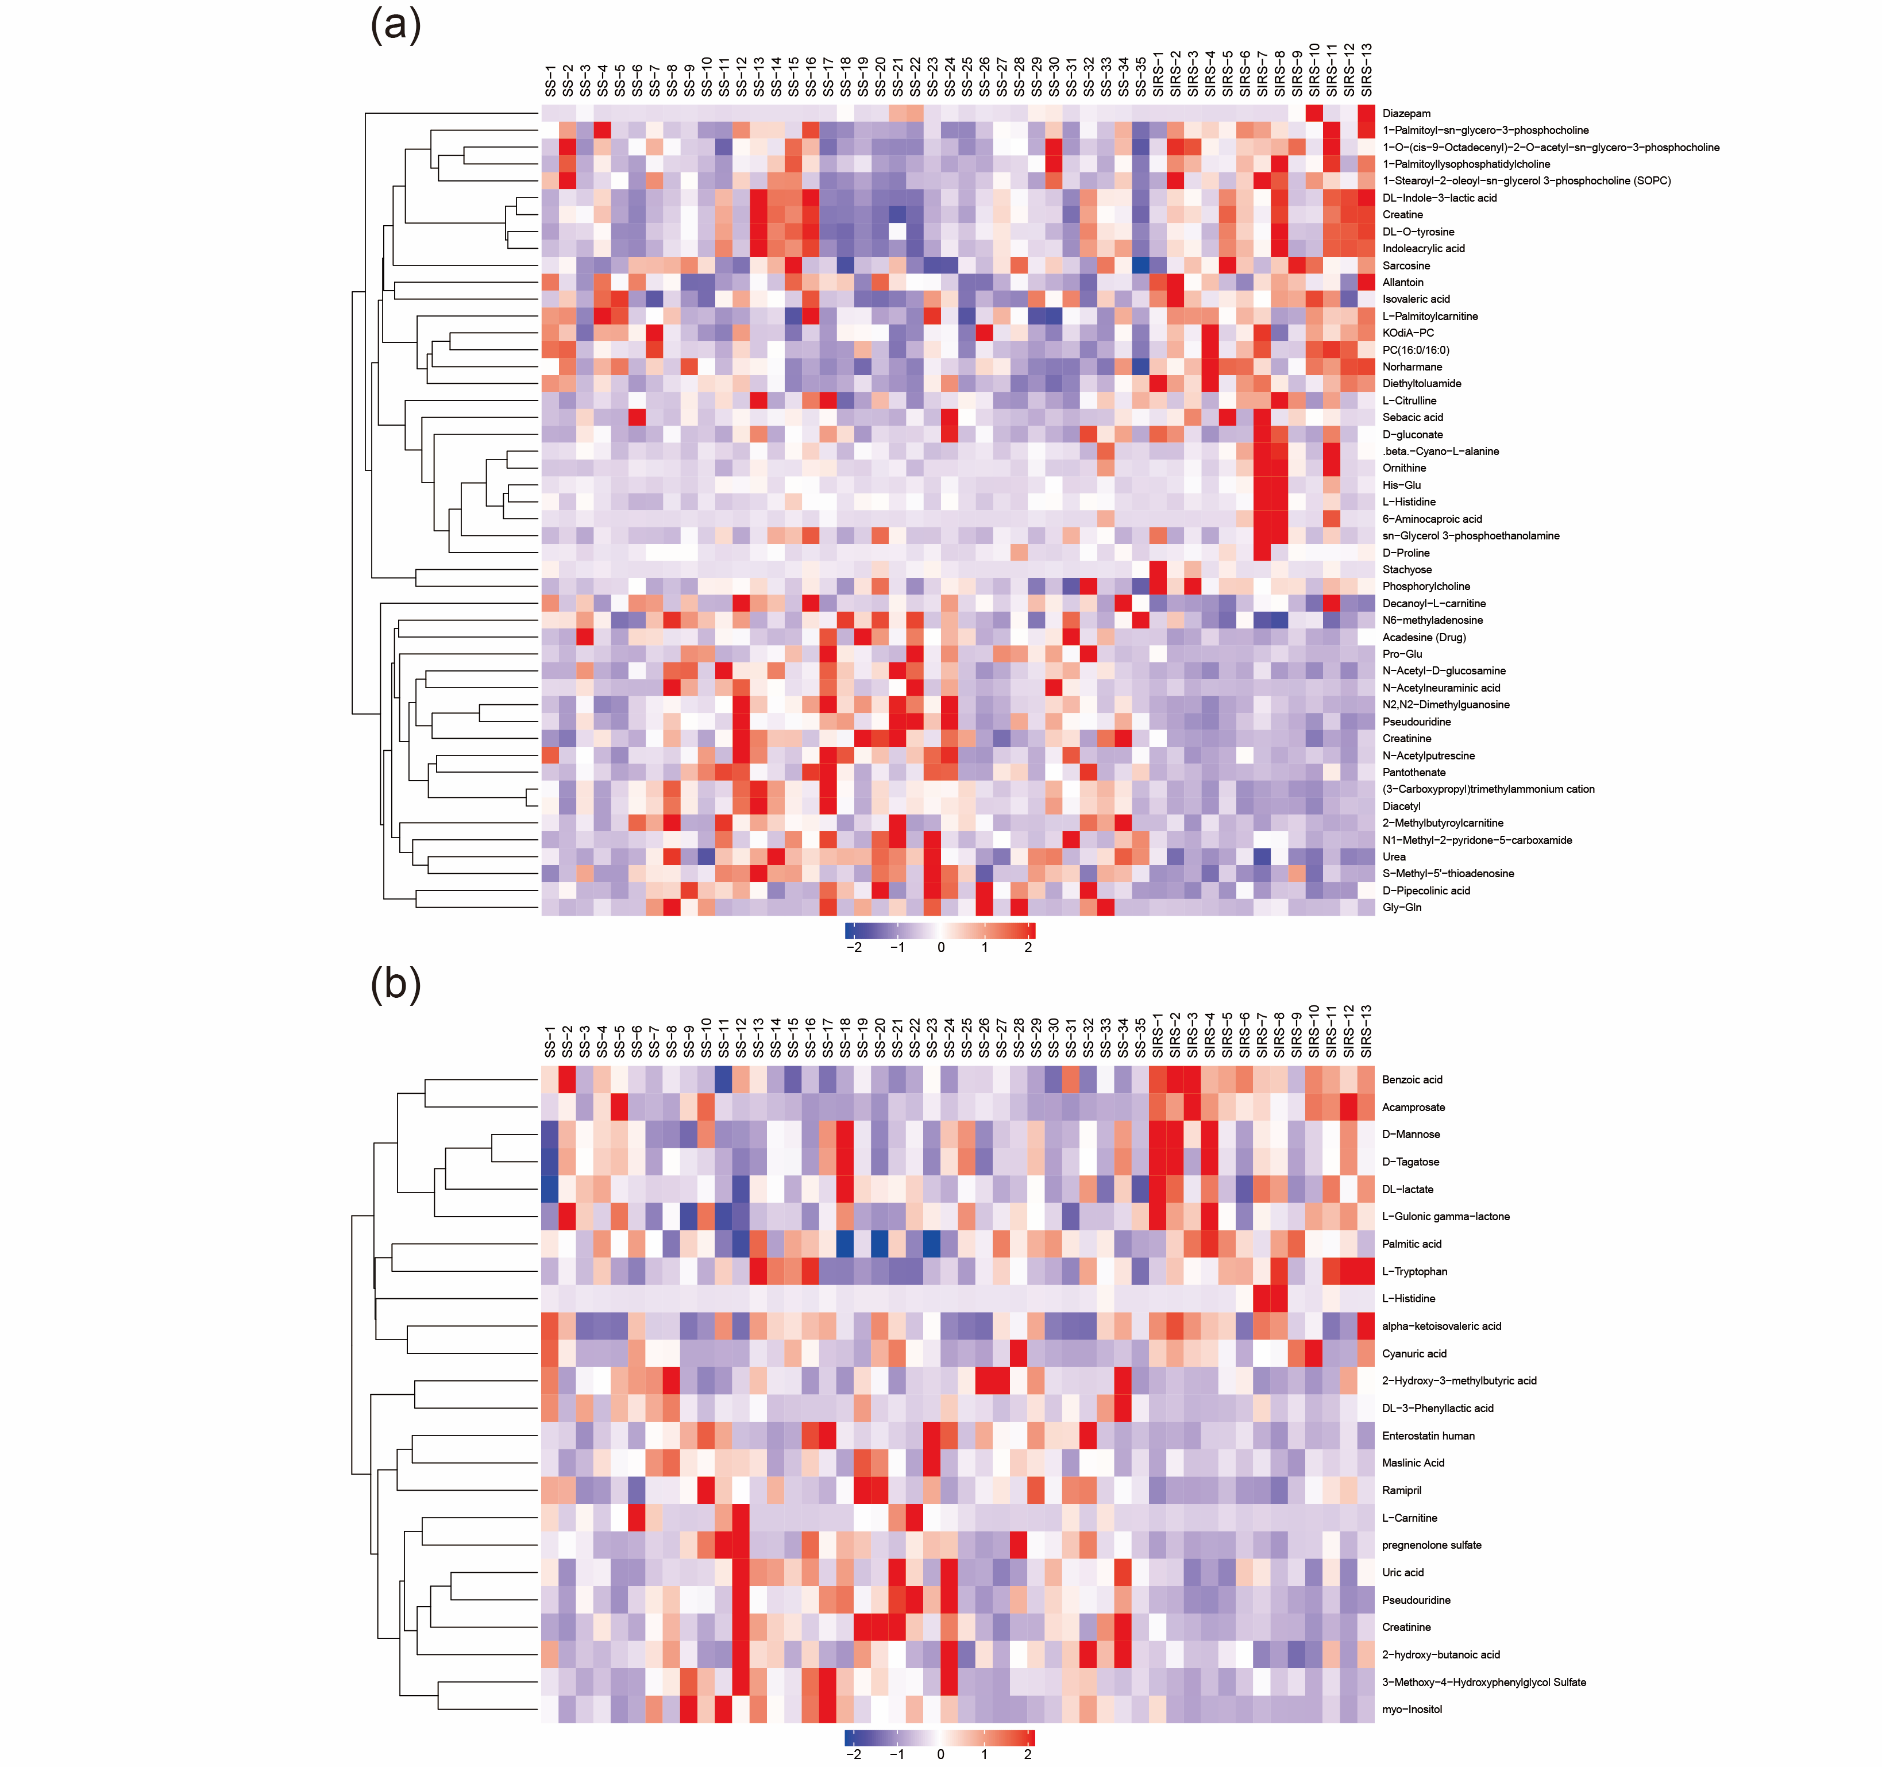


**eFigure 4** Cluster analysis of the differential metabolites in septic survivors versus non-infected SIRS controls. Cluster analysis for septic shock survivors (SS) versus non-infected SIRS controls (SIRS) separation (a) in positive mode and (b) in negative mode.


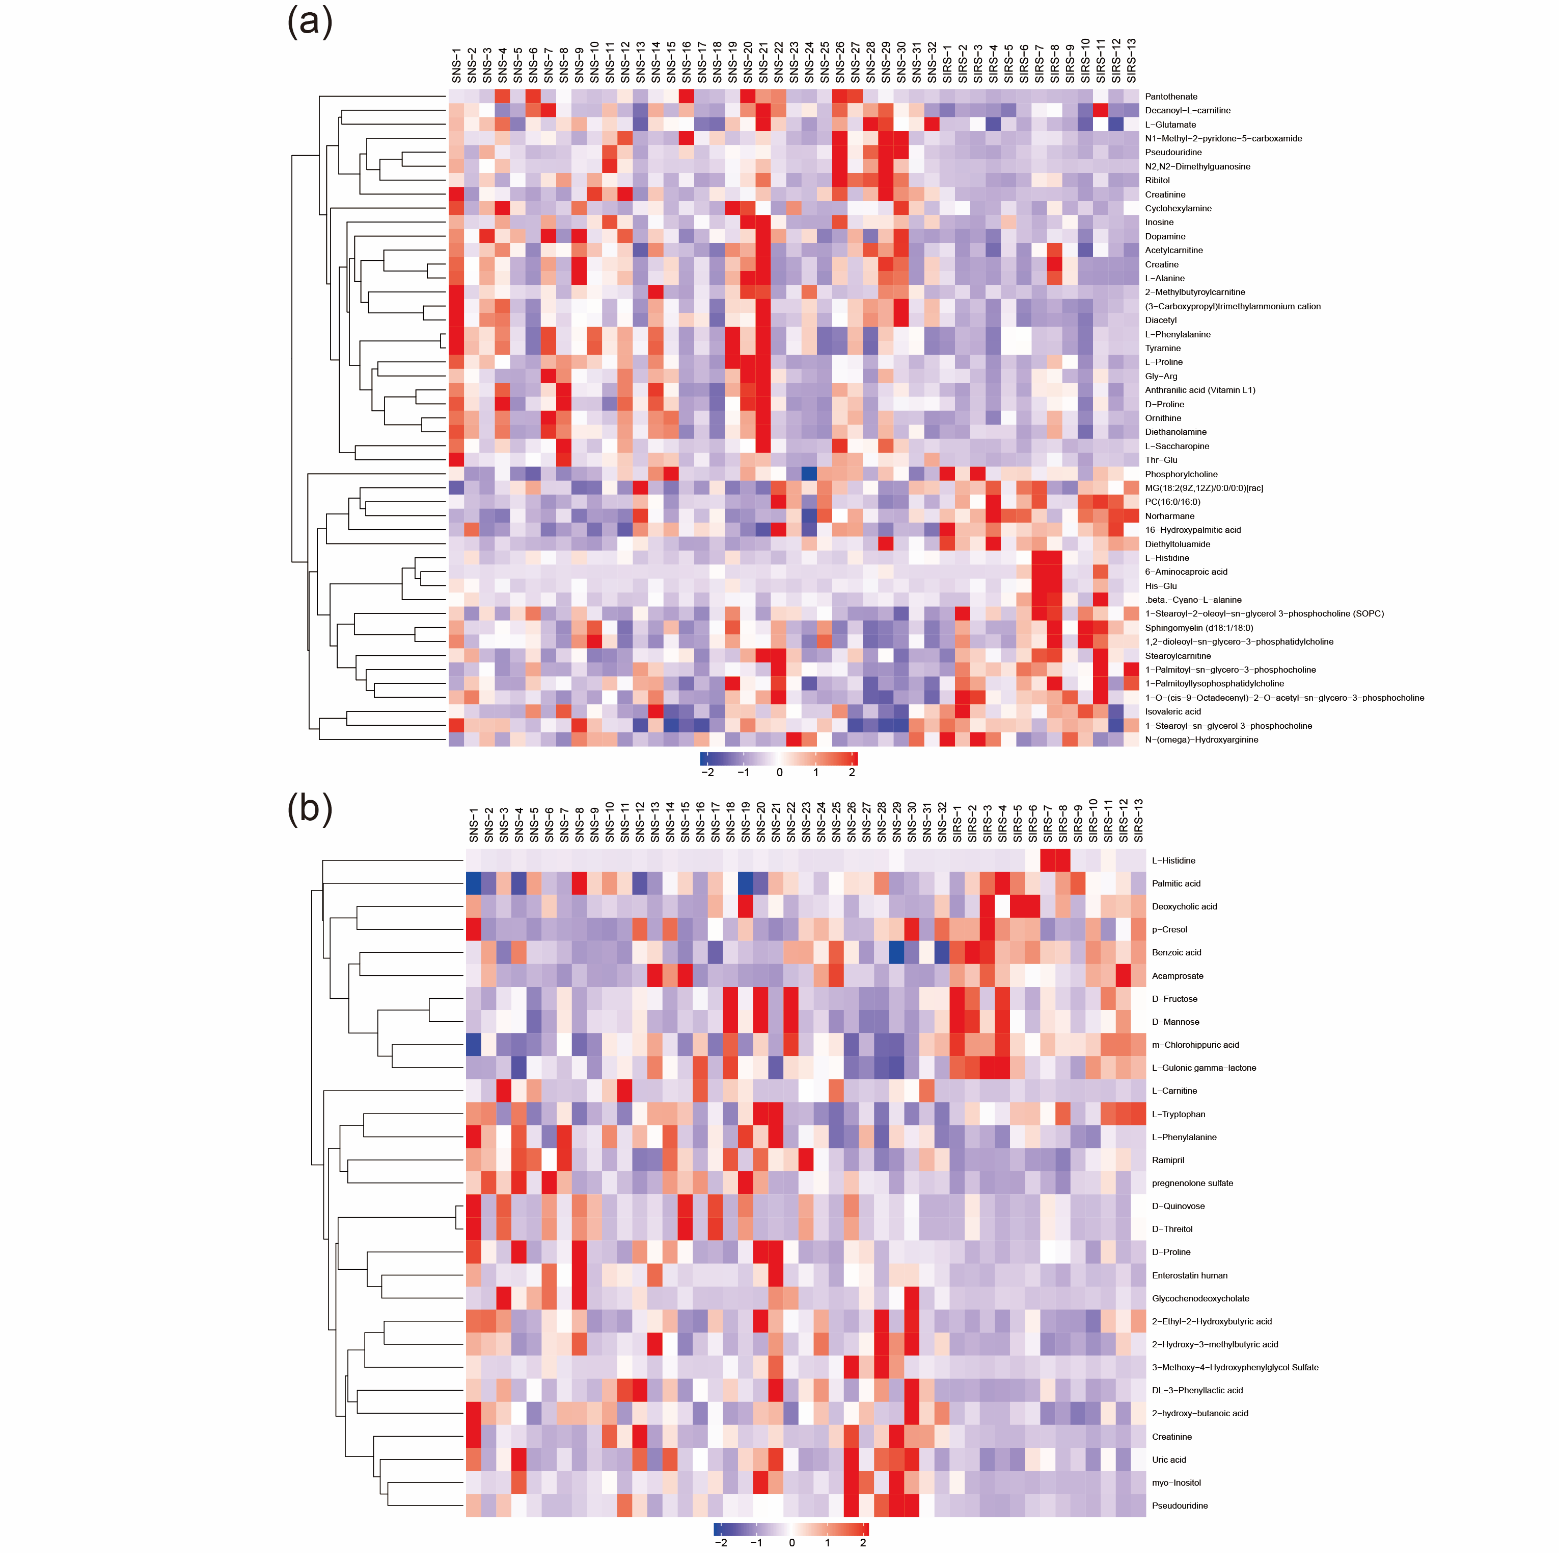


**eFigure 5** Cluster analysis of the differential metabolites in septic non-survivors versus non-infected SIRS controls. Cluster analysis for septic shock non-survivors (SNS) versus non-infected SIRS controls (SIRS) separation (a) in positive mode and (b) in negative mode.
